# Supplementary material for: Oxygen-vacancy rich IrxMo1−xOy nanofibers for oxygen evolution reaction: excellent pH-universal and electrolyte-concentration-independent catalytic activity
Source: Royal Society of Chemistry journal article supplement (doi:10.1039/d3ta01614e), 2023-01-01
Supplement: d3ta01614e1.pdf [file d3ta01614e1.pdf]

## Supporting Information

# **Oxygen-Vacancy Rich $\text{Ir}_x\text{Mo}_{1-x}\text{O}_y$ Nanofibers for Oxygen Evolution Reaction: pH-Universal and Electrolyte-Concentration Independent Excellent Catalytic Activity**

Sung Hwa Ahn,<sup>1</sup> Dasol Jin,<sup>1</sup> Chongmok Lee, Youngmi Lee\*

*Department of Chemistry & Nanoscience, Ewha Womans University, Seoul 03760, Republic  
of Korea*

<sup>1</sup>Equally contributed to this work

\*Corresponding author: [youngmilee@ewha.ac.kr](mailto:youngmilee@ewha.ac.kr) (Y. L.)

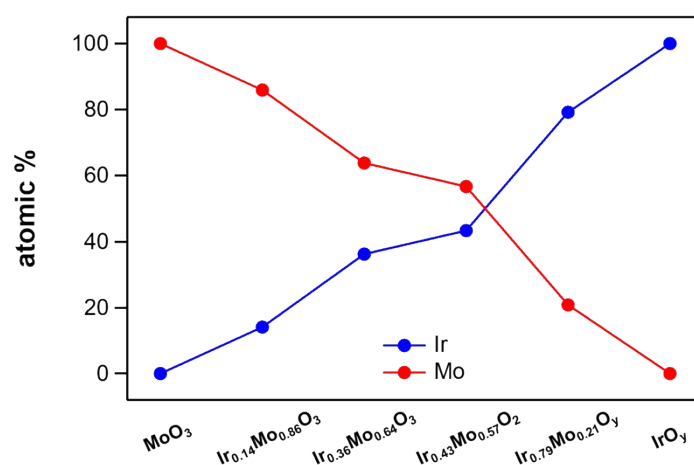

**Fig. S1.** Relative atomic percentages of Ir and Mo in the  $\text{Ir}_x\text{Mo}_{1-x}\text{O}_y$  samples determined with EDS analysis. The values were calculated by averaging the EDS spectra collected from 10 different areas for each sample and were tabulated in Table S1.

**Table S1.** Comparison of atomic percentages of the  $\text{Ir}_x\text{Mo}_{1-x}\text{O}_y$  samples determined with EDS analysis.

| Sample                                       | Ir (at.%)            | Mo (at.%)            |
|----------------------------------------------|----------------------|----------------------|
| $\text{Ir}_{0.14}\text{Mo}_{0.86}\text{O}_3$ | 14.07 ( $\pm 1.29$ ) | 85.93 ( $\pm 1.29$ ) |
| $\text{Ir}_{0.36}\text{Mo}_{0.64}\text{O}_3$ | 36.25 ( $\pm 1.42$ ) | 63.75 ( $\pm 1.42$ ) |
| $\text{Ir}_{0.43}\text{Mo}_{0.57}\text{O}_2$ | 43.37 ( $\pm 0.70$ ) | 56.63 ( $\pm 0.70$ ) |
| $\text{Ir}_{0.79}\text{Mo}_{0.21}\text{O}_y$ | 79.14 ( $\pm 2.51$ ) | 20.86 ( $\pm 2.51$ ) |

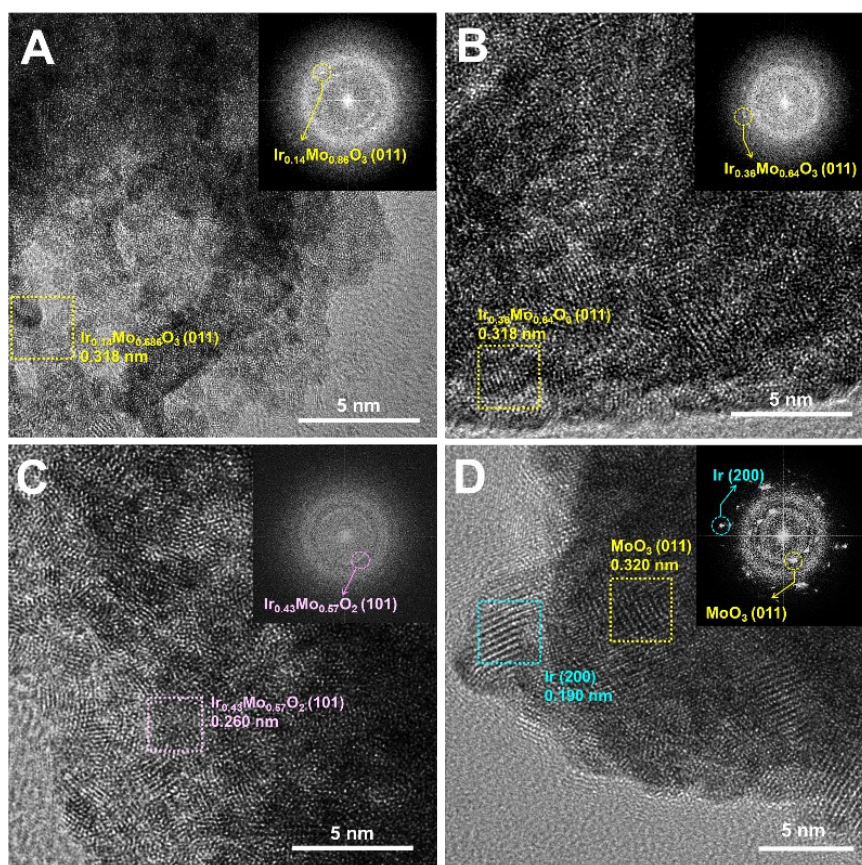

**Fig. S2.** High-resolution TEM images of (A)  $\text{Ir}_{0.14}\text{Mo}_{0.86}\text{O}_3$ , (B)  $\text{Ir}_{0.36}\text{Mo}_{0.64}\text{O}_3$ , (C)  $\text{Ir}_{0.43}\text{Mo}_{0.57}\text{O}_2$ , and (D)  $\text{Ir}_{0.79}\text{Mo}_{0.21}\text{O}_y$ . Insets: corresponding FFT patterns.

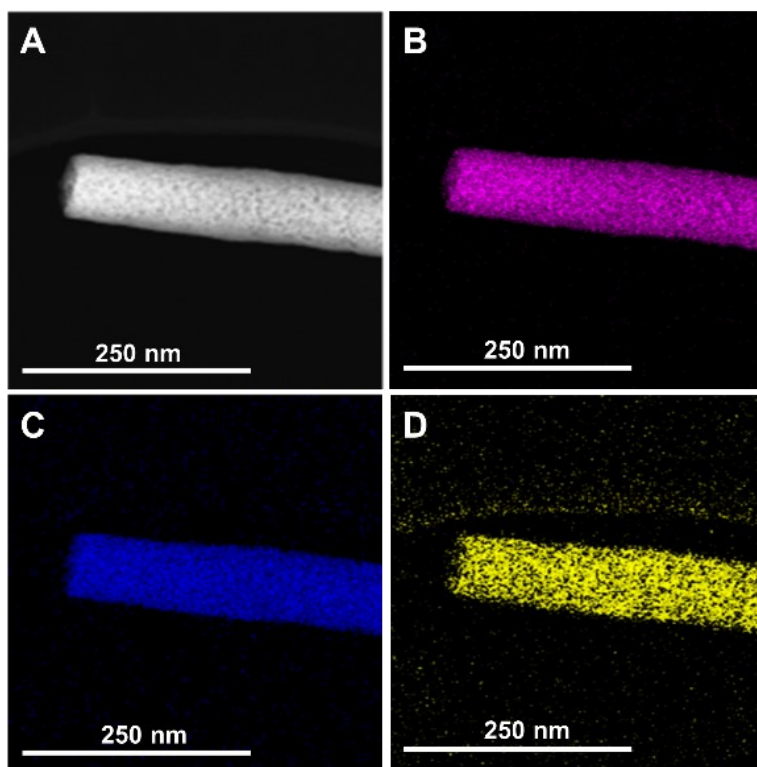

**Fig. S3.** (A) Representative TEM image and (B-D) elemental mapping images of  $\text{Ir}_{0.43}\text{Mo}_{0.57}\text{O}_2$ . Pink, blue and yellow colors correspond to the elements of Ir, Mo and O, respectively.

**Table S2.** Accurate Ir 4f peak positions obtained from XPS peaks in Fig. 4A.

| Catalyst |            | $\text{Ir}_{0.43}\text{Mo}_{0.57}\text{O}_2$ | $\text{IrO}_y$ |
|----------|------------|----------------------------------------------|----------------|
| Ir 4f    | $4f_{7/2}$ | $\text{Ir}^{4+}$                             | 61.63          |
|          |            | $\text{Ir}^{3+}$                             | 62.58          |
|          |            | Ir                                           | 60.88          |
|          | $4f_{5/2}$ | $\text{Ir}^{4+}$                             | 64.58          |
|          |            | $\text{Ir}^{3+}$                             | 65.63          |
|          |            | Ir                                           | 63.68          |

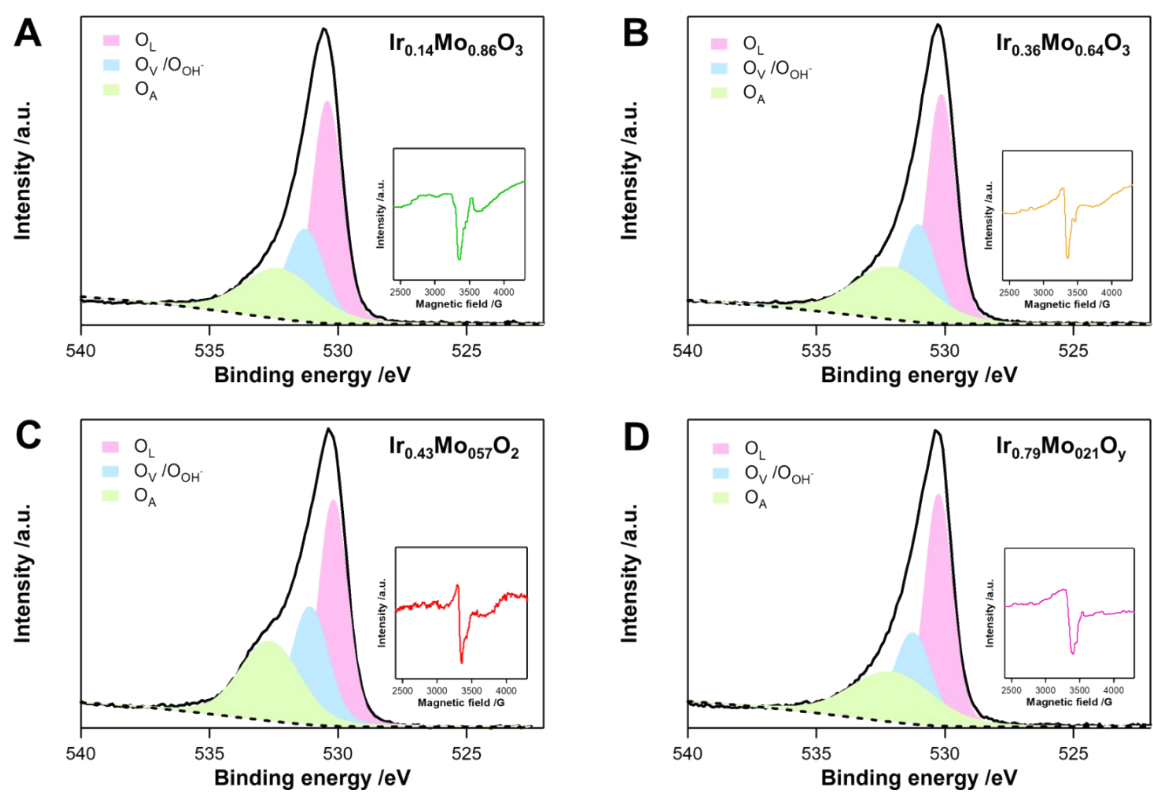

**Fig. S4.** Deconvoluted O 1s XPS spectra of  $\text{Ir}_x\text{Mo}_{1-x}\text{O}_y$  nanomaterials ( $0 < x < 1$ ). Insets: corresponding EPR spectra.

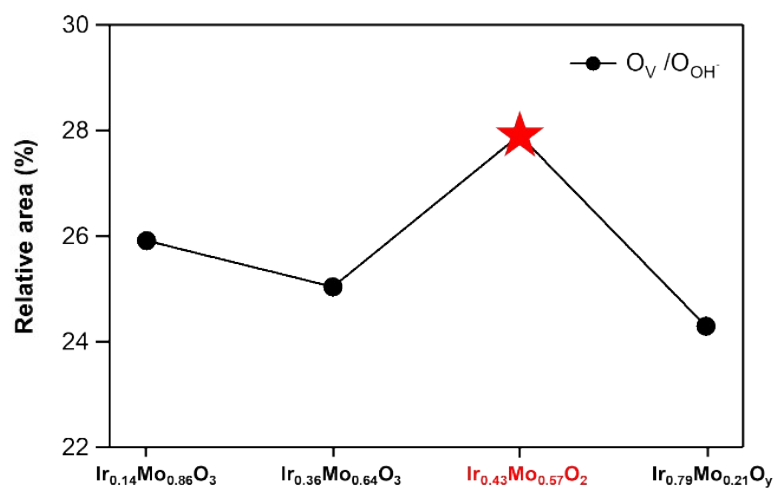

**Fig. S5.** Relative XPS peak area associated with surface hydroxyl oxygen ( $\text{O}_V/\text{O}_{\text{OH}^-}$ ) out of total peak area in O 1s region for  $\text{Ir}_x\text{Mo}_{1-x}\text{O}_y$  ( $0 < x < 1$ ) nanomaterials.



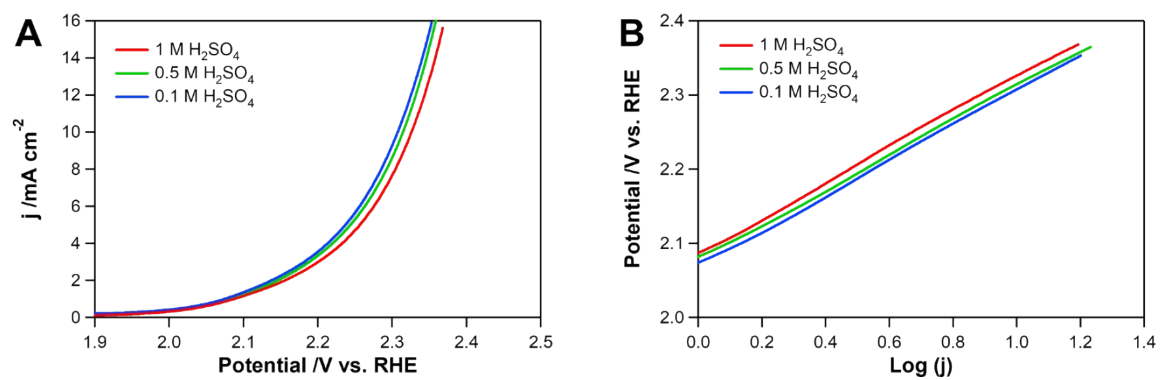

**Fig. S6.** (A) Polarization curves for OER at 1 mV s<sup>-1</sup> on the catalysts of MoO<sub>3</sub> in H<sub>2</sub>SO<sub>4</sub> solutions and (B) the corresponding Tafel plots derived from the LSVs.

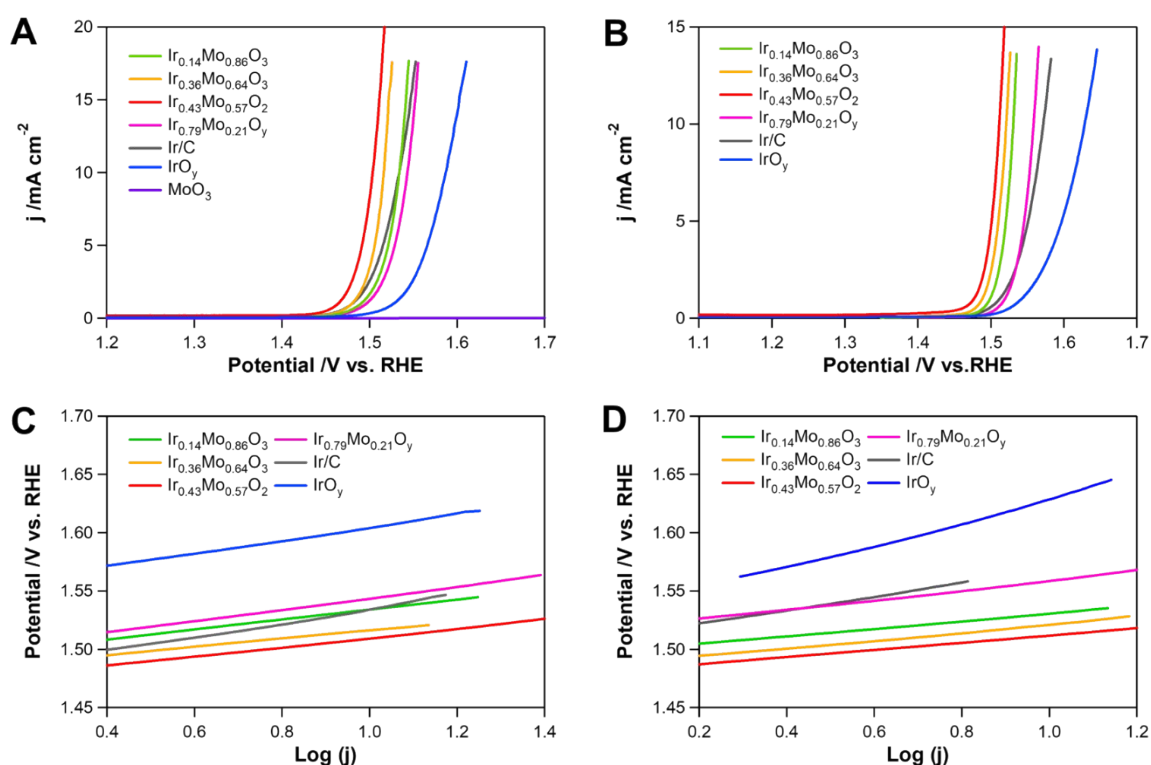

**Fig. S7.** (A,B) Polarization curves of as-prepared Ir<sub>x</sub>Mo<sub>1-x</sub>O<sub>y</sub> series, IrO<sub>y</sub> and Ir/C measured in Ar-saturated 0.5 M aqueous electrolytes at a scan rate of 1 mV s<sup>-1</sup> and a rotating speed of 1600 rpm. (C,D) Corresponding Tafel plots derived from the LSVs. The measurements were performed in 0.5 M solutions of (A,C) H<sub>2</sub>SO<sub>4</sub>, (B,D) KOH.

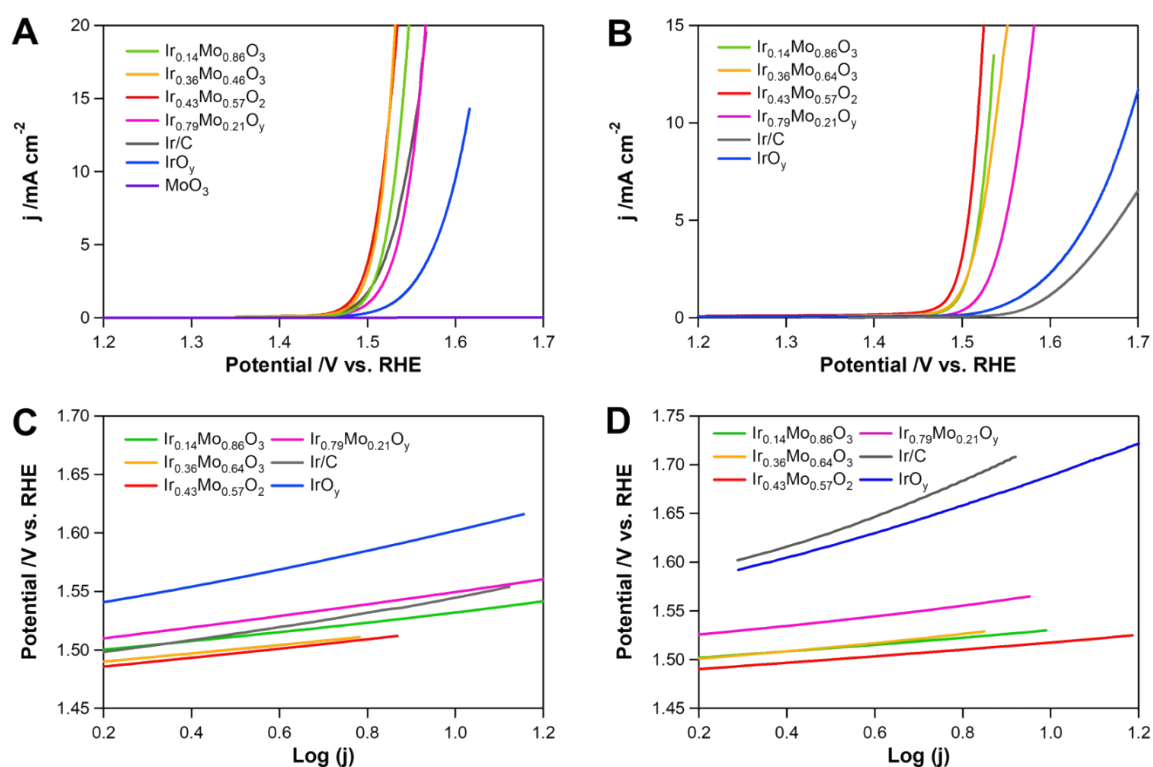

**Fig. S8.** (A,B) Polarization curves of as-prepared  $\text{Ir}_x\text{Mo}_{1-x}\text{O}_y$  series,  $\text{IrO}_y$  and  $\text{Ir/C}$  measured in Ar-saturated 0.1 M aqueous electrolytes at a scan rate of  $1 \text{ mV s}^{-1}$  and a rotating speed of 1600 rpm. (C,D) Corresponding Tafel plots derived from the LSVs. The measurements were performed in 0.1 M solutions of (A,C)  $\text{H}_2\text{SO}_4$  and (B,D)  $\text{KOH}$ .

**Table S3.** Comparison of potential (V vs. RHE) at current density of 10 mA cm<sup>-2</sup> of Ir<sub>x</sub>Mo<sub>1-x</sub>O<sub>y</sub> series, single metal oxides (IrO<sub>y</sub> and MoO<sub>3</sub>) and Ir/C as a function of pH varied with different electrolyte concentrations.

| Catalyst<br>pH<br>(electrolyte)                   | Ir <sub>0.14</sub> Mo <sub>0.86</sub> O <sub>3</sub> | Ir <sub>0.36</sub> Mo <sub>0.64</sub> O <sub>3</sub> | <b>Ir<sub>0.43</sub>Mo<sub>0.57</sub>O<sub>2</sub></b> | Ir <sub>0.79</sub> Mo <sub>0.21</sub> O <sub>y</sub> | Ir/C  | IrO <sub>y</sub> | MoO <sub>3</sub> |
|---------------------------------------------------|------------------------------------------------------|------------------------------------------------------|--------------------------------------------------------|------------------------------------------------------|-------|------------------|------------------|
| 0<br>(1 M H <sub>2</sub> SO <sub>4</sub> )        | 1.538                                                | 1.530                                                | <b>1.500</b>                                           | 1.541                                                | 1.538 | 1.574            | 2.326            |
| 0.3<br>(0.5 M<br>H <sub>2</sub> SO <sub>4</sub> ) | 1.535                                                | 1.517                                                | <b>1.504</b>                                           | 1.544                                                | 1.540 | 1.587            | 2.315            |
| 1<br>(0.1 M<br>H <sub>2</sub> SO <sub>4</sub> )   | 1.532                                                | 1.519                                                | <b>1.517</b>                                           | 1.549                                                | 1.547 | 1.601            | 2.308            |
| 7.1<br>(1 M PBS)                                  | 1.536                                                | 1.517                                                | <b>1.507</b>                                           | 1.591                                                | 1.581 | 1.687            | -                |
| 13<br>(0.1 M KOH)                                 | 1.531                                                | 1.538                                                | <b>1.518</b>                                           | 1.568                                                | 1.747 | 1.689            | -                |
| 13.7<br>(0.5 M KOH)                               | 1.530                                                | 1.521                                                | <b>1.512</b>                                           | 1.558                                                | 1.571 | 1.629            | -                |
| 14<br>(1 M KOH)                                   | 1.530                                                | 1.520                                                | <b>1.515</b>                                           | 1.557                                                | 1.548 | 1.617            | -                |

**Table S4.** Comparison of Tafel slope ( $\text{mV dec}^{-1}$ ) of  $\text{Ir}_x\text{Mo}_{1-x}\text{O}_y$  series, single metal oxides ( $\text{IrO}_y$  and  $\text{MoO}_3$ ) and Ir/C as a function of pH varied with different electrolyte concentrations.

| Catalyst<br>pH<br>(electrolyte)         | $\text{Ir}_{0.14}\text{Mo}_{0.86}\text{O}_3$ | $\text{Ir}_{0.36}\text{Mo}_{0.64}\text{O}_3$ | <b><math>\text{Ir}_{0.43}\text{Mo}_{0.57}\text{O}_2</math></b> | $\text{Ir}_{0.79}\text{Mo}_{0.21}\text{O}_y$ | Ir/C | $\text{IrO}_y$ | $\text{MoO}_3$ |
|-----------------------------------------|----------------------------------------------|----------------------------------------------|----------------------------------------------------------------|----------------------------------------------|------|----------------|----------------|
| 0<br>(1 M $\text{H}_2\text{SO}_4$ )     | 50.2                                         | 41.6                                         | <b>39.0</b>                                                    | 49.6                                         | 56.3 | 54.8           | 240            |
| 0.3<br>(0.5 M $\text{H}_2\text{SO}_4$ ) | 43.6                                         | 38.3                                         | <b>38.1</b>                                                    | 48.1                                         | 56.1 | 58.2           | 234            |
| 1<br>(0.1 M $\text{H}_2\text{SO}_4$ )   | 40.0                                         | 38.9                                         | <b>38.8</b>                                                    | 49.9                                         | 59.0 | 70.1           | 238            |
| 7.1<br>(1 M PBS)                        | 49.4                                         | 41.7                                         | <b>41.5</b>                                                    | 75.7                                         | 95.0 | 118            | -              |
| 13<br>(0.1 M KOH)                       | 34.6                                         | 40.3                                         | <b>34.5</b>                                                    | 51.4                                         | 171  | 149            | -              |
| 13.7<br>(0.5 M KOH)                     | 32.1                                         | 33.2                                         | <b>31.7</b>                                                    | 40.6                                         | 57.2 | 98.2           | -              |
| 14<br>(1 M KOH)                         | 30.7                                         | 30.8                                         | <b>30.6</b>                                                    | 38.2                                         | 50.5 | 75.4           | -              |

**Table S5.** Comparison of mass activities of the samples under the different pH values of 1 M solutions.

| Catalyst                                             | Mass activity (mA mg <sub>Ir</sub> <sup>-1</sup> ) |                 |       |
|------------------------------------------------------|----------------------------------------------------|-----------------|-------|
|                                                      | H <sub>2</sub> SO <sub>4</sub>                     | PBS<br>(pH 7.1) | KOH   |
| Ir <sub>0.14</sub> Mo <sub>0.86</sub> O <sub>3</sub> | 52.51                                              | 64.56           | 30.57 |
| Ir <sub>0.36</sub> Mo <sub>0.64</sub> O <sub>3</sub> | 61.83                                              | 78.92           | 66.10 |
| Ir <sub>0.43</sub> Mo <sub>0.57</sub> O <sub>2</sub> | 127.8                                              | 134.4           | 143.4 |
| Ir <sub>0.79</sub> Mo <sub>0.21</sub> O <sub>y</sub> | 40.12                                              | 16.89           | 9.912 |
| Ir/C                                                 | 129.5                                              | 96.48           | 52.54 |

**Table S6.** Comparison of turnover frequency (TOF) values of  $\text{Ir}_x\text{Mo}_{1-x}\text{O}_y$  materials ( $0 < x < 1$ ) in 1 M  $\text{H}_2\text{SO}_4$ , 1 M PBS (pH 7.1) and 1 M KOH solutions. Each TOF calculation was specifically performed at a potential of 1.53 V (vs. RHE).

| Solution                    | Sample                                                         | TOF ( $\text{s}^{-1}$ ) |
|-----------------------------|----------------------------------------------------------------|-------------------------|
| 1 M $\text{H}_2\text{SO}_4$ | $\text{Ir}_{0.14}\text{Mo}_{0.86}\text{O}_3$                   | 0.013                   |
|                             | $\text{Ir}_{0.36}\text{Mo}_{0.64}\text{O}_3$                   | 0.013                   |
|                             | <b><math>\text{Ir}_{0.43}\text{Mo}_{0.57}\text{O}_2</math></b> | <b>0.047</b>            |
|                             | $\text{Ir}_{0.79}\text{Mo}_{0.21}\text{O}_y$                   | 0.006                   |
| 1 M PBS (pH 7.1)            | $\text{Ir}_{0.14}\text{Mo}_{0.86}\text{O}_3$                   | 0.013                   |
|                             | $\text{Ir}_{0.36}\text{Mo}_{0.64}\text{O}_3$                   | 0.014                   |
|                             | <b><math>\text{Ir}_{0.43}\text{Mo}_{0.57}\text{O}_2</math></b> | <b>0.028</b>            |
|                             | $\text{Ir}_{0.79}\text{Mo}_{0.21}\text{O}_y$                   | 0.002                   |
| 1 M KOH                     | $\text{Ir}_{0.14}\text{Mo}_{0.86}\text{O}_3$                   | 0.016                   |
|                             | $\text{Ir}_{0.36}\text{Mo}_{0.64}\text{O}_3$                   | 0.018                   |
|                             | <b><math>\text{Ir}_{0.43}\text{Mo}_{0.57}\text{O}_2</math></b> | <b>0.041</b>            |
|                             | $\text{Ir}_{0.79}\text{Mo}_{0.21}\text{O}_y$                   | 0.002                   |

Turnover frequency (TOF) is a straightforward intrinsic activity marker that can demonstrate how efficient an electrocatalyst is for the reaction of interest with determining the exact number of active sites participating in the catalysis.

The turnover frequency (TOF) was calculated using following equation:

$$\text{TOF} = (\text{Generated number of } \text{O}_2 \text{ molecules}) / (\text{Number of metal sites})$$

where the generated number of  $\text{O}_2$  molecules is obtained from the measured current density ( $j$ ) and surface area of the metal oxide ( $A$ ), according to the following equation:

$$\text{Number of } \text{O}_2 \text{ molecules} = (j \frac{\text{mA}}{\text{cm}^2}) (A \text{ cm}^2) \left( \frac{1 \frac{\text{C}}{\text{s}}}{1000 \text{ mA}} \right) \left( \frac{1 \text{ mol } e^-}{96,485 \text{ C}} \right) \left( \frac{1 \text{ mol } \text{O}_2}{4 \text{ mol } e^-} \right) \left( \frac{6.02 \times 10^{23} \text{ O}_2}{1 \text{ mol } \text{O}_2} \right)$$

where the number of metal sites is the number of loaded Ir atoms on the electrode.

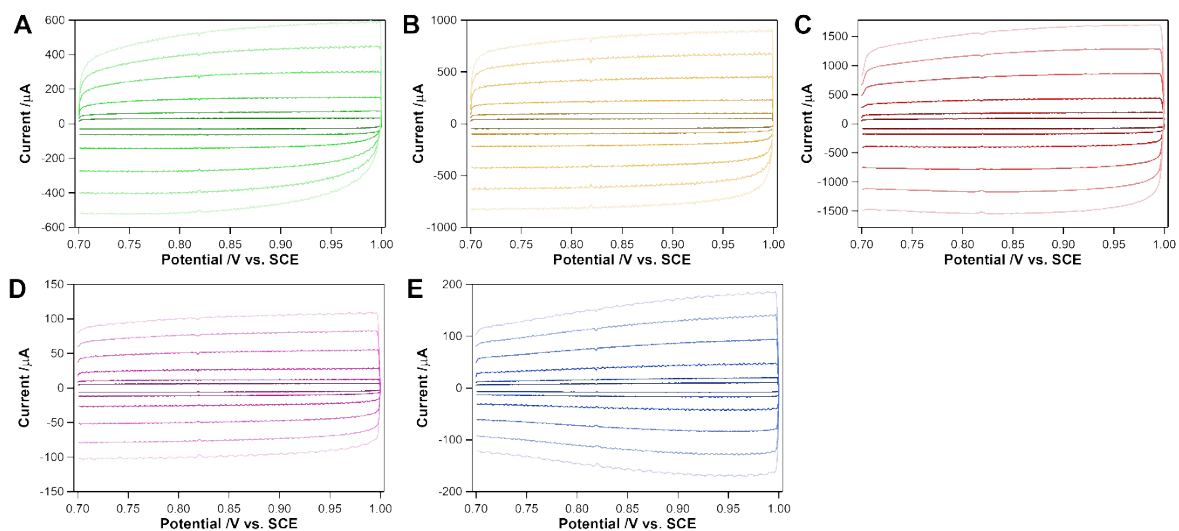

**Fig. S9.** Cyclic voltammograms of (A)  $\text{Ir}_{0.14}\text{Mo}_{0.86}\text{O}_3$ , (B)  $\text{Ir}_{0.36}\text{Mo}_{0.64}\text{O}_3$ , (C)  $\text{Ir}_{0.43}\text{Mo}_{0.57}\text{O}_2$ , (D)  $\text{Ir}_{0.79}\text{Mo}_{0.21}\text{O}_y$  and (E)  $\text{IrO}_y$  in 1 M  $\text{H}_2\text{SO}_4$  solution (*aq*) at various scan rates (10, 20, 50, 100, 150 and 200  $\text{mV s}^{-1}$ ).



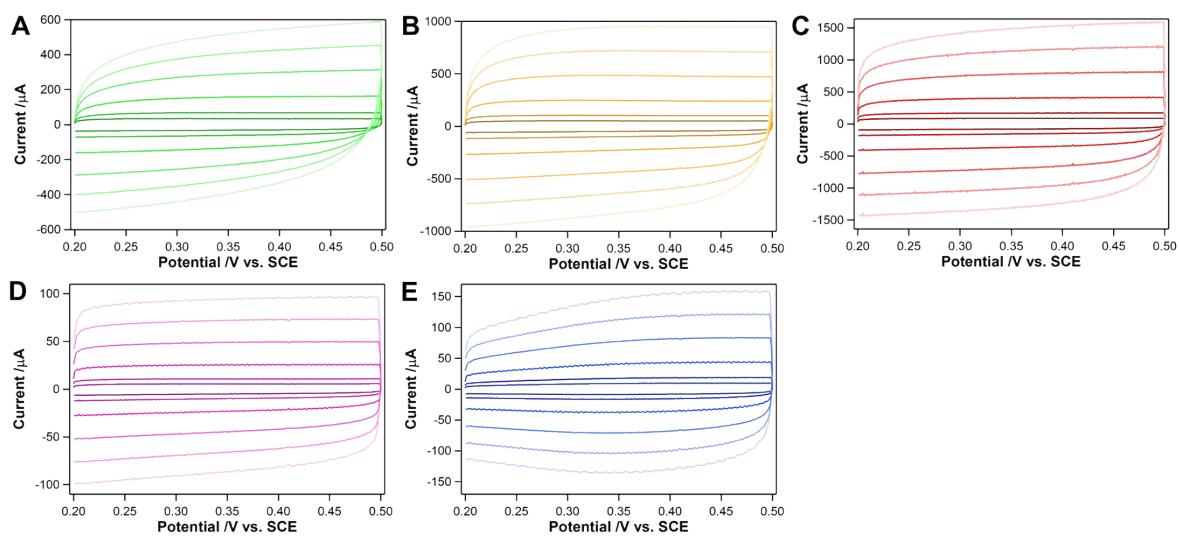

**Fig. S10.** Cyclic voltammograms of (A)  $\text{Ir}_{0.14}\text{Mo}_{0.86}\text{O}_3$ , (B)  $\text{Ir}_{0.36}\text{Mo}_{0.64}\text{O}_3$ , (C)  $\text{Ir}_{0.43}\text{Mo}_{0.57}\text{O}_2$ , (D)  $\text{Ir}_{0.79}\text{Mo}_{0.21}\text{O}_y$  and (E)  $\text{IrO}_y$  in 1 M PBS (*aq*, pH 7.1) at various scan rates (10, 20, 50, 100, 150 and 200  $\text{mV s}^{-1}$ ).

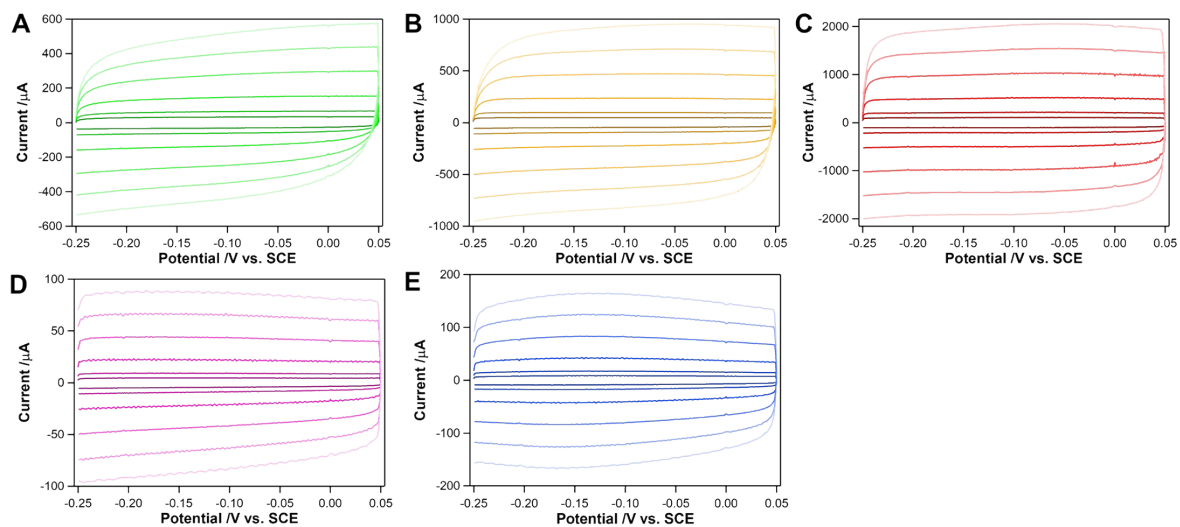

**Fig. S11.** Cyclic voltammograms of (A)  $\text{Ir}_{0.14}\text{Mo}_{0.86}\text{O}_3$ , (B)  $\text{Ir}_{0.36}\text{Mo}_{0.64}\text{O}_3$ , (C)  $\text{Ir}_{0.43}\text{Mo}_{0.57}\text{O}_2$ , (D)  $\text{Ir}_{0.79}\text{Mo}_{0.21}\text{O}_y$  and (E)  $\text{IrO}_y$  in 1 M KOH solution ( $aq$ ) at various scan rates (10, 20, 50, 100, 150 and 200  $\text{mV s}^{-1}$ ).

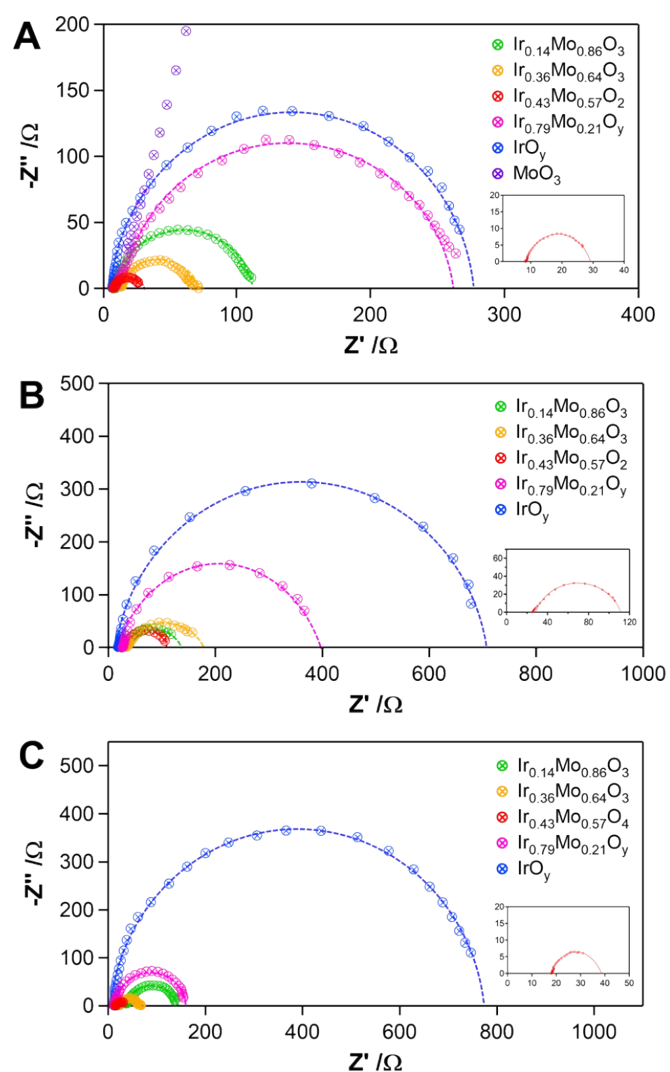

**Fig. S12.** Nyquist plots of various nanomaterials at 1.54 V (vs. RHE) in (A) 1 M  $\text{H}_2\text{SO}_4$ , (B) 1 M PBS (pH 7.1), and (C) 1 M KOH solutions. Insets: enlarge plots along the x-axis for

**Table S7.** Comparison of the charge transfer resistance values for the  $\text{Ir}_x\text{Mo}_{1-x}\text{O}_y$  samples under acidic, neutral and alkaline conditions.

| Catalysts                                                      | Resistance ( $\Omega$ )     |              |              |
|----------------------------------------------------------------|-----------------------------|--------------|--------------|
|                                                                | 1 M $\text{H}_2\text{SO}_4$ | 1 M PBS      | 1 M KOH      |
| $\text{Ir}_{0.14}\text{Mo}_{0.86}\text{O}_3$                   | 102.1                       | 114.6        | 111.0        |
| $\text{Ir}_{0.36}\text{Mo}_{0.64}\text{O}_3$                   | 63.61                       | 136.8        | 56.91        |
| <b><math>\text{Ir}_{0.43}\text{Mo}_{0.57}\text{O}_2</math></b> | <b>24.26</b>                | <b>80.38</b> | <b>40.65</b> |
| $\text{Ir}_{0.79}\text{Mo}_{0.21}\text{O}_y$                   | 244.1                       | 381.5        | 145.1        |
| $\text{IrO}_y$                                                 | 267.8                       | 688.9        | 756.1        |

**Table S8.** Comparison of OER activities (*i.e.*, Tafel slopes and potential at 10 mA cm<sup>-2</sup>) of Ir<sub>0.43</sub>Mo<sub>0.57</sub>O<sub>2</sub> and other previously reported Ir-based electrocatalysts under the aqueous solutions with various pH values.

| Catalysts                                                                        | Solution                                 | Potential<br>at 10 mA cm <sup>-2</sup><br>(V vs. RHE) | Tafel slope<br>(mV dec <sup>-1</sup> ) | ref       |
|----------------------------------------------------------------------------------|------------------------------------------|-------------------------------------------------------|----------------------------------------|-----------|
| <b>Ir<sub>0.43</sub>Mo<sub>0.57</sub>O<sub>2</sub></b>                           | <b>1 M H<sub>2</sub>SO<sub>4</sub></b>   | <b>1.505</b>                                          | <b>39</b>                              | This work |
| <b>Ir<sub>0.43</sub>Mo<sub>0.57</sub>O<sub>2</sub></b>                           | <b>0.5 M H<sub>2</sub>SO<sub>4</sub></b> | <b>1.506</b>                                          | <b>38.1</b>                            | This work |
| <sup>(a)</sup> IrMoO <sub>x</sub>                                                | 0.5 M H <sub>2</sub> SO <sub>4</sub>     | 1.497                                                 | 46.1                                   | [31]      |
| <sup>(b)</sup> P-IrO <sub>x</sub> @DG                                            | 0.5 M H <sub>2</sub> SO <sub>4</sub>     | 1.521                                                 | 67.5                                   | [48]      |
| <sup>(c)</sup> Ir-MoO <sub>3</sub>                                               | 0.5 M H <sub>2</sub> SO <sub>4</sub>     | 1.386                                                 | 48                                     | [58]      |
| <sup>(d)</sup> BPIr-be                                                           | 0.5 M H <sub>2</sub> SO <sub>4</sub>     | 1.52                                                  | 64                                     | [49]      |
| <sup>(e)</sup> Y <sub>2</sub> Ru <sub>1.2</sub> Ir <sub>0.8</sub> O <sub>7</sub> | 0.5 M H <sub>2</sub> SO <sub>4</sub>     | 1.45                                                  | 47.56                                  | [50]      |
| <sup>(f)</sup> Ir <sub>0.48</sub> Cu <sub>0.52</sub> O <sub>y</sub>              | 0.5 M H <sub>2</sub> SO <sub>4</sub>     | 1.488                                                 | 40.6                                   | [33]      |
| <b>Ir<sub>0.43</sub>Mo<sub>0.57</sub>O<sub>2</sub></b>                           | <b>0.1 M H<sub>2</sub>SO<sub>4</sub></b> | <b>1.520</b>                                          | <b>38.8</b>                            | This work |
| <sup>(g)</sup> Ir-NSG                                                            | 0.1 M HClO <sub>4</sub>                  | 1.495                                                 | 44.2                                   | [51]      |
| <sup>(h)</sup> IrO <sub>2</sub> /LiLa <sub>2</sub> IrO <sub>6</sub>              | 0.1 M HClO <sub>4</sub>                  | 1.522                                                 | 39.2                                   | [52]      |
| <sup>(i)</sup> Ru@IrO <sub>x</sub>                                               | 0.05 M H <sub>2</sub> SO <sub>4</sub>    | 1.512                                                 | 69.1                                   | [57]      |
| <sup>(i)</sup> IM-30                                                             | 0.1 M HClO <sub>4</sub>                  | 1.68 (j=25.2)                                         | 57                                     | [59]      |
| <b>Ir<sub>0.43</sub>Mo<sub>0.57</sub>O<sub>2</sub></b>                           | <b>1 M PBS</b>                           | <b>1.496</b>                                          | <b>41.5</b>                            | This work |
| <sup>(b)</sup> P-IrO <sub>x</sub> @DG                                            | 1 M PBS                                  | 1.570                                                 | 106.4                                  | [48]      |
| <sup>(f)</sup> Ir <sub>0.48</sub> Cu <sub>0.52</sub> O <sub>y</sub>              | 1 M PBS                                  | 1.558                                                 | 68.2                                   | [33]      |
| <sup>(g)</sup> Ir-NSG                                                            | 1 M PBS                                  | 1.537                                                 | 74.2                                   | [51]      |
| <sup>(d)</sup> BPIr-be                                                           | PBS (pH=7)                               | 1.85                                                  | 70                                     | [49]      |
| <b>Ir<sub>0.43</sub>Mo<sub>0.57</sub>O<sub>2</sub></b>                           | <b>1 M KOH</b>                           | <b>1.506</b>                                          | <b>30.6</b>                            | This work |
| <sup>(b)</sup> P-IrO <sub>x</sub> @DG                                            | 1 M KOH                                  | 1.478                                                 | 52.8                                   | [48]      |
| <sup>(k)</sup> Ir/Ni(OH) <sub>2</sub>                                            | 1 M KOH                                  | 1.454                                                 | 41                                     | [53]      |
| <sup>(f)</sup> Ir <sub>0.48</sub> Cu <sub>0.52</sub> O <sub>y</sub>              | 1 M KOH                                  | 1.517                                                 | 37.1                                   | [33]      |
| <sup>(l)</sup> Ir <sub>SA</sub> -Ni <sub>2</sub> P                               | 1 M KOH                                  | 1.379                                                 | 90.1                                   | [54]      |
| <sup>(m)</sup> Ir/CoNiB                                                          | 1 M KOH                                  | 1.408                                                 | 35.1                                   | [55]      |
| <sup>(g)</sup> Ir-NSG                                                            | 1 M KOH                                  | 1.486                                                 | 39.9                                   | [51]      |
| <sup>(d)</sup> BPIr-be                                                           | 1 M KOH                                  | 1.52                                                  | 70                                     | [49]      |
| <b>Ir<sub>0.43</sub>Mo<sub>0.57</sub>O<sub>2</sub></b>                           | <b>0.5 M KOH</b>                         | <b>1.505</b>                                          | <b>31.7</b>                            | This work |
| <b>Ir<sub>0.43</sub>Mo<sub>0.57</sub>O<sub>2</sub></b>                           | <b>0.1 M KOH</b>                         | <b>1.508</b>                                          | <b>34.5</b>                            | This work |
| <sup>(n)</sup> SrIrO <sub>3</sub>                                                | 0.1 M KOH                                | 1.530                                                 | 42                                     | [56]      |

<sup>(a)</sup>IrMoO<sub>x</sub> represents nanofibers distributed the two components of MoO<sub>x</sub> and IrO<sub>x</sub>; <sup>(b)</sup>P-IrO<sub>x</sub>@DG represents porous IrO<sub>x</sub> nanoclusters supported on defective graphene (DG); <sup>(c)</sup>Ir-MoO<sub>3</sub> represents semiconducting metal oxides consisting of Ir and MoO<sub>3</sub> embedded by graphitic carbon layers; <sup>(d)</sup>BPIr-be represents exposed 2D black phosphorus (BP) nanosheets by coating the Ir nanoparticle on the carbon cloth (CC) substrate and then the BP nanosheets on the top; <sup>(e)</sup>Y<sub>2</sub>Ru<sub>1.2</sub>Ir<sub>0.8</sub>O<sub>7</sub> represents iridium doped yttrium ruthenate pyrochlore catalysts; <sup>(f)</sup>Ir<sub>0.48</sub>Cu<sub>0.52</sub>O<sub>y</sub> represents nanotube that Cu is inserted within IrO<sub>2</sub>; <sup>(g)</sup>Ir-NSG represents iridium nanoclusters embedded on nitrogen and sulfur co-doped graphene; <sup>(h)</sup>IrO<sub>2</sub>/LiLa<sub>2</sub>IrO<sub>6</sub> represents LiLa<sub>2</sub>IrO<sub>6</sub> electrocatalyst with a thin IrO<sub>2</sub> shell; <sup>(i)</sup>IM-30 represents iridium-based molybdenum mixed oxide composites; <sup>(j)</sup>Ru@IrO<sub>x</sub> represents a core-shell RuIr nanostructure with a highly strained and disordered Ru core and a partially oxidized Ir shell; <sup>(k)</sup>Ir/Ni(OH)<sub>2</sub> represents Ir nanoparticles anchored on the Ni(OH)<sub>2</sub> nanosheets; <sup>(l)</sup>Ir<sub>SA</sub>-Ni<sub>2</sub>P represents an iridium single atom on Ni<sub>2</sub>P catalyst; <sup>(m)</sup>Ir/CoNiB represents iridium clusters decorated on CoNiB (amorphous metal borides); <sup>(n)</sup>SrIrO<sub>3</sub> represents perovskite oxide in a monoclinic structure.

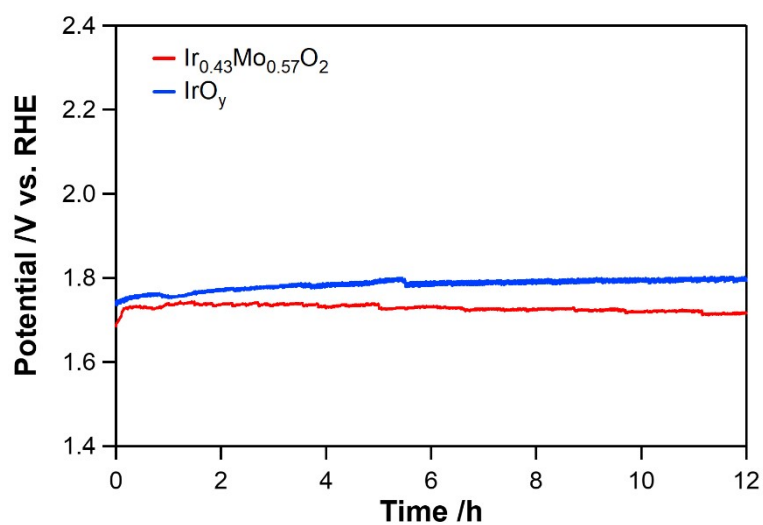

**Fig. S13.** Chronopotentiometric performances of  $\text{Ir}_{0.43}\text{Mo}_{0.57}\text{O}_2$  and  $\text{IrO}_y$  under a constant current density of  $10 \text{ mA cm}^{-2}$  in  $1 \text{ M NaCl (aq)}$  for  $12 \text{ h}$ .

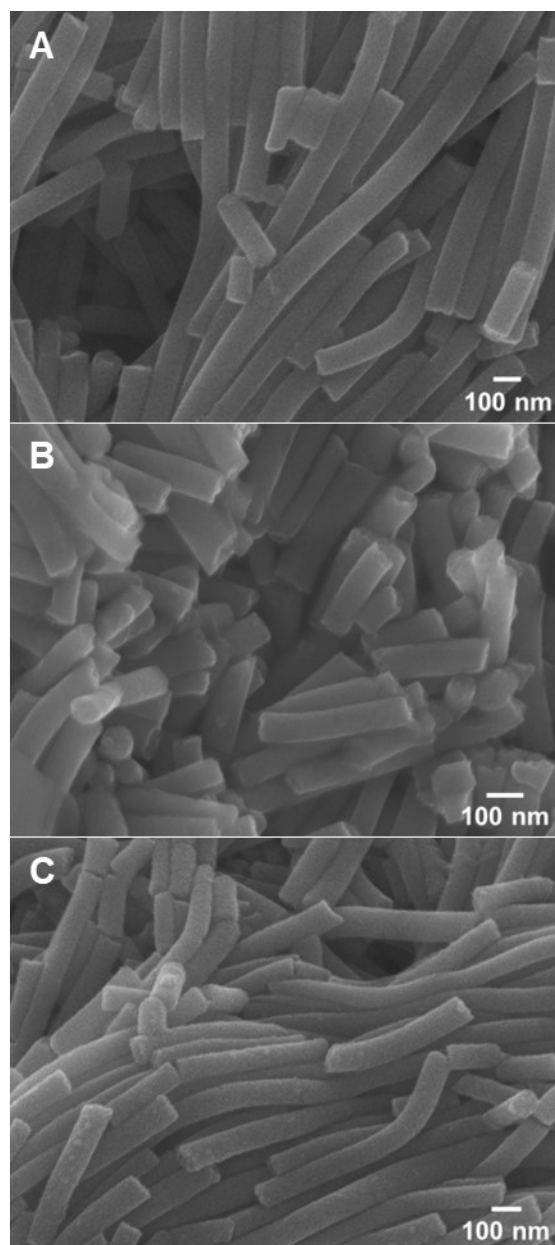

**Fig. S14.** SEM image of Ir<sub>0.43</sub>Mo<sub>0.57</sub>O<sub>2</sub> nanofibers after stability test for 12 h in (A) 1 M H<sub>2</sub>SO<sub>4</sub>, (B) 1 M PBS and (C) 1 M KOH solutions.



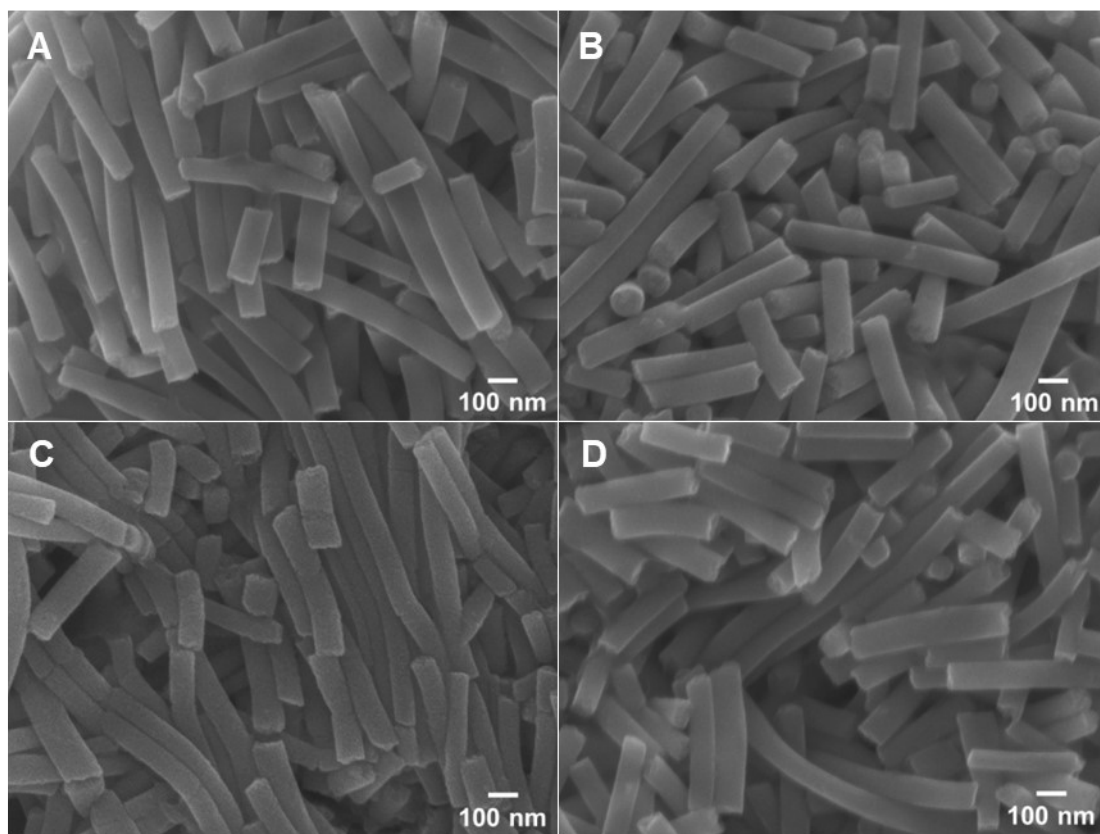

**Fig. S15.** SEM image of  $\text{Ir}_{0.43}\text{Mo}_{0.57}\text{O}_2$  nanofibers after stability test for 12 h in (A,B)  $\text{H}_2\text{SO}_4$  and (C,D) KOH solutions with different concentrations (A,C for 0.5 M; B,D for 0.1 M).

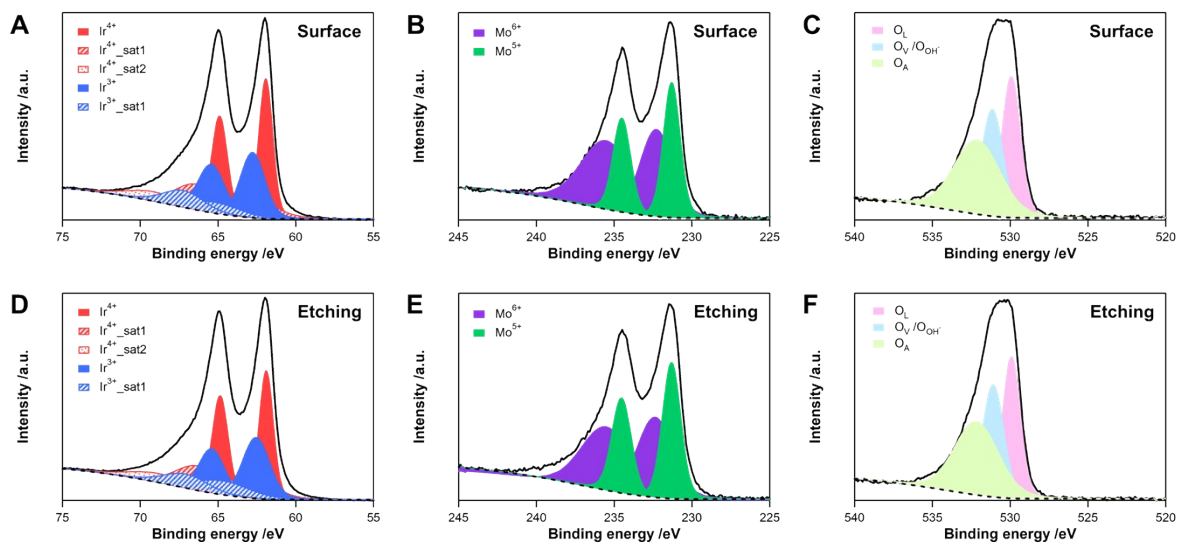

**Fig. S16.** Deconvoluted XPS core level spectra for (A,D) Ir 4f, (B,E) Mo 3d, (C,F) O 1s regions of  $\text{Ir}_{0.43}\text{Mo}_{0.57}\text{O}_2$  obtained after stability test for 12 h in 1 M  $\text{H}_2\text{SO}_4$ . The spectra were collected for the material surface (A-C) before and (D-F) after etching for 5 seconds.

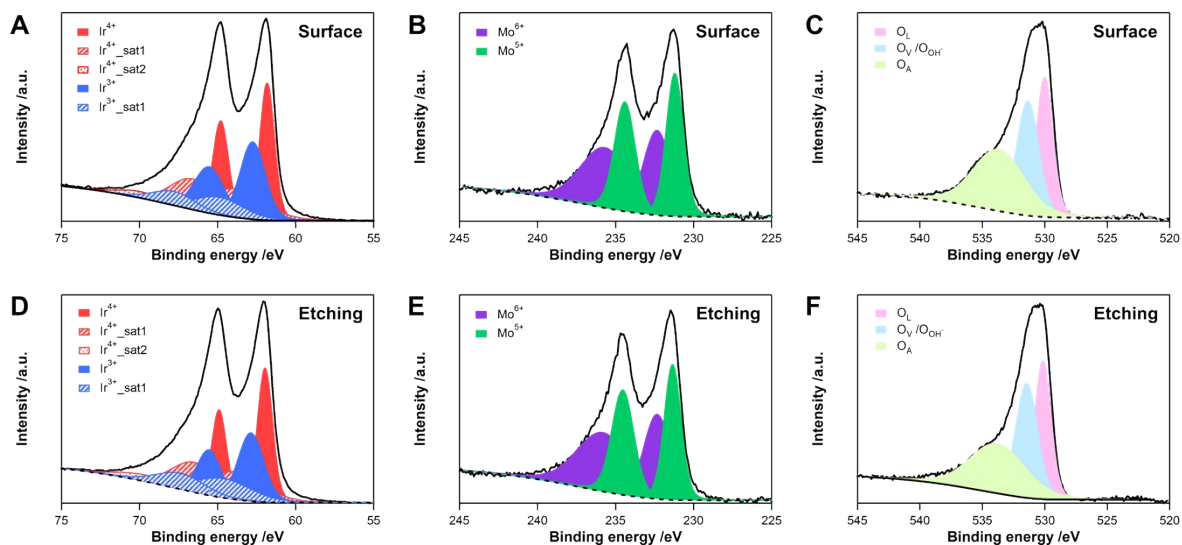

**Fig. S17.** Deconvoluted XPS core level spectra for (A,D) Ir 4f, (B,E) Mo 3d, (C,F) O 1s regions of  $\text{Ir}_{0.43}\text{Mo}_{0.57}\text{O}_2$  obtained after stability test for 12 h in 1 M PBS (pH 7.1). The spectra were collected for the material surface (A-C) before and (D-F) after etching for 5 seconds.

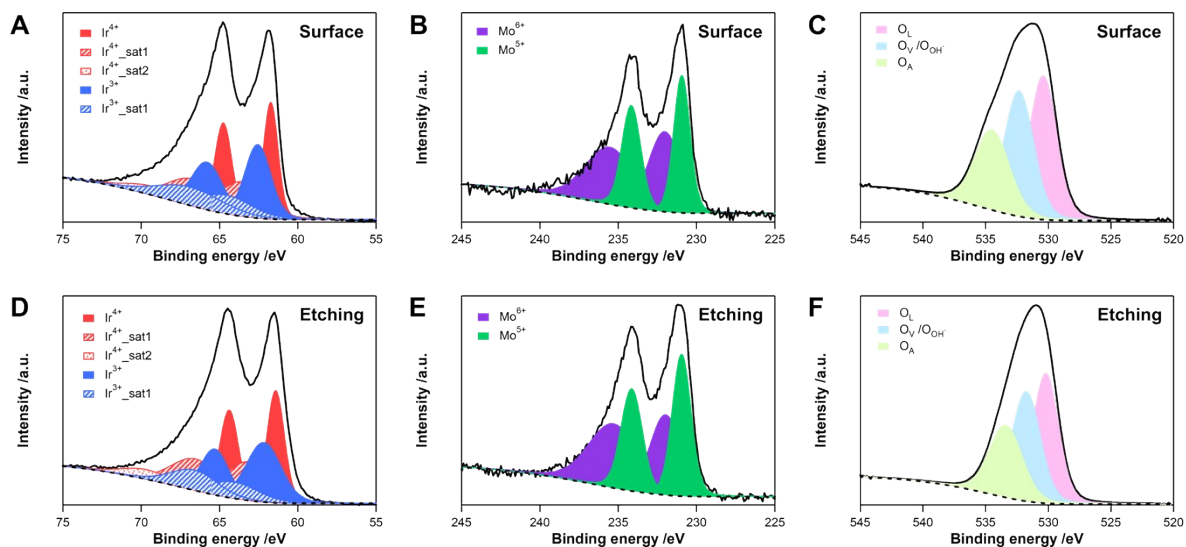

**Fig. S18.** Deconvoluted XPS core level spectra for (A,D) Ir 4f, (B,E) Mo 3d, (C,F) O 1s regions of  $\text{Ir}_{0.43}\text{Mo}_{0.57}\text{O}_2$  obtained after stability test for 12 h in 1 M KOH. The spectra were collected for the material surface (A-C) before and (D-F) after etching for 5 seconds.
